# Supplementary material for: Lactic acid fermentation of goji berries (Lycium barbarum) prevents acute alcohol liver injury and modulates gut microbiota and metabolites in mice
Source: Royal Society of Chemistry journal article supplement (doi:10.1039/d3fo03324d), 2024-01-01
Supplement: d3fo03324d2.pdf [file d3fo03324d2.pdf]

## Supplementary Materials

| Primer name                    | Forward (5'-3')        | Reverse (3'-5')          |
|--------------------------------|------------------------|--------------------------|
| <i>Il-6</i>                    | TCCAGTTGCCTTCTTGGGAC   | AGTCTCCTCTCCGGACTTGT     |
| <i>Il-1<math>\beta</math></i>  | ATGAAAGACGGCACACCCAC   | GCTTGTGCTCTGCTTGTGAG     |
| <i>Tnf-<math>\alpha</math></i> | GGTGCCTATGTCTCAGCCTCTT | GCCATAGAAGCTGATGAGAGGGAG |
| <i>Tgf-<math>\beta</math>1</i> | GCTCGCTTTGTACAACAGCACC | GCGGTCCACCATTAGCACG      |
| <i>Zo-1</i>                    | AGGACACCAAAGCATGTGAG   | GGCATTCCCTGCTGGTTACA     |
| <i>Occludin</i>                | CGGTACAGCAGCAATGGTAA   | CTCCCCACCTGTCGTGTAGT     |
| <i>Claudin-1</i>               | CTGTGGATGTCCTGCGTTTC   | TCATGCACTTCATGCCAATG     |
| <i>Gapdh</i>                   | TGAAGCAGGCATCTGAGGG    | CGAAGGTGGAAGAGTGGGAG     |

Table S1 The information on primers

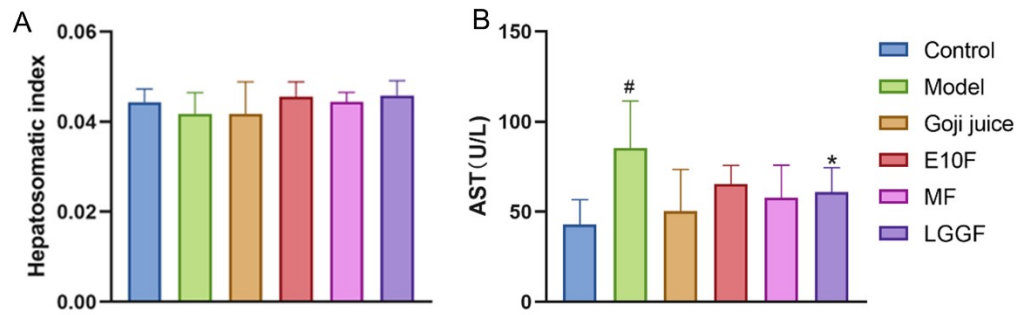

Fig. S1. The effects of the intake of fermented goji juices on liver damage and liver inflammatory response in alcohol-induced liver injury mice. The hepatosomatic index (A) and AST (B) levels. Data presented as mean  $\pm$  SEM (n= 8). # $p < 0.05$  vs. Control group, \* $p < 0.05$  vs. Model group. Significant differences between mean values were determined by a one-way ANOVA test of significance.

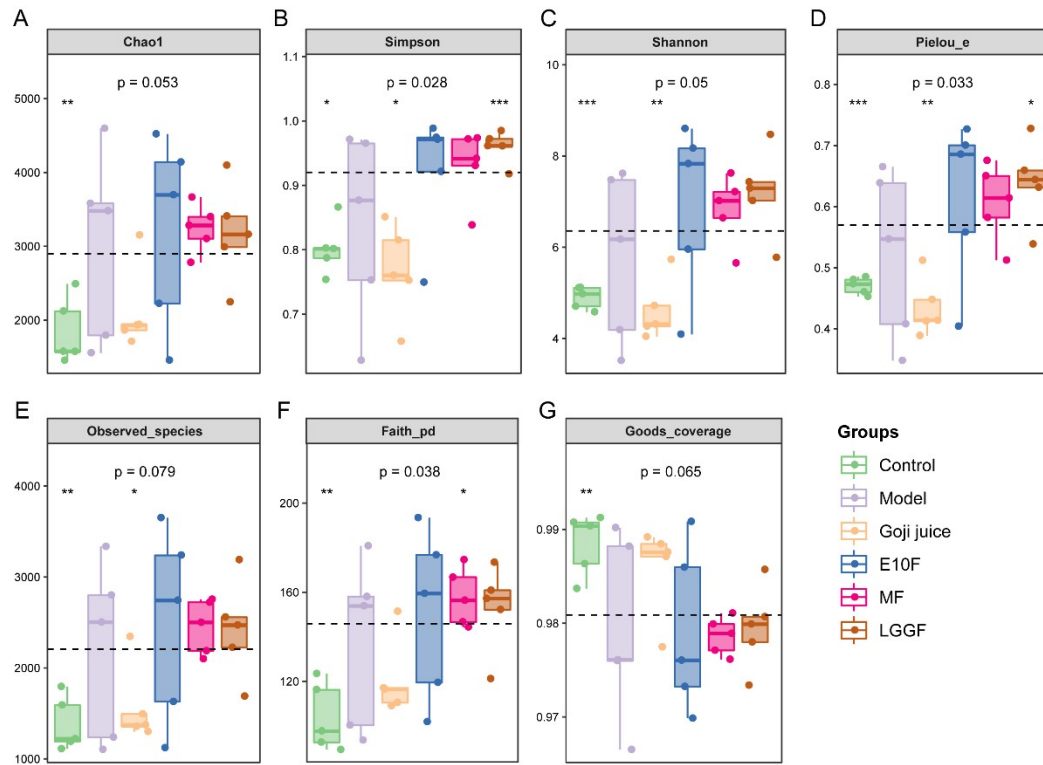

Fig. S2. Effect of fermented goji juices administration on gut microbiota structure evaluated by  $\alpha$ -diversity. (A) Chao1 index, (B) Simpson index, (C) Shannon index, (D) Pielou\_e index, (E) Observed\_species, (F) Faith\_pd, (G) Goods\_coverage.

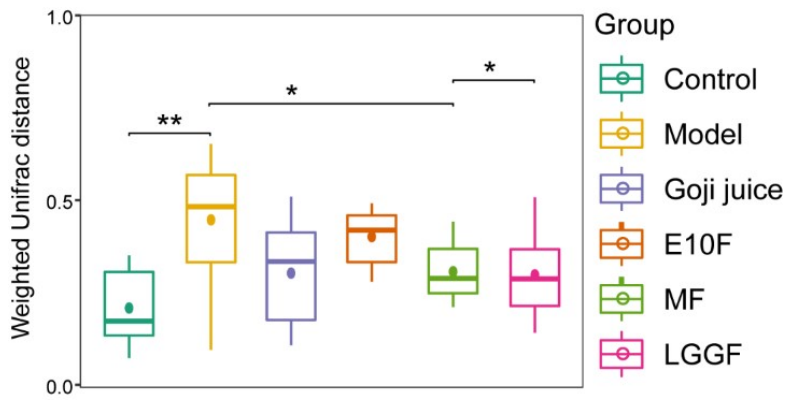

Fig. S3. Effect of fermented goji juices administration on the structure of gut microbiota evaluated by weight unifrac distance.

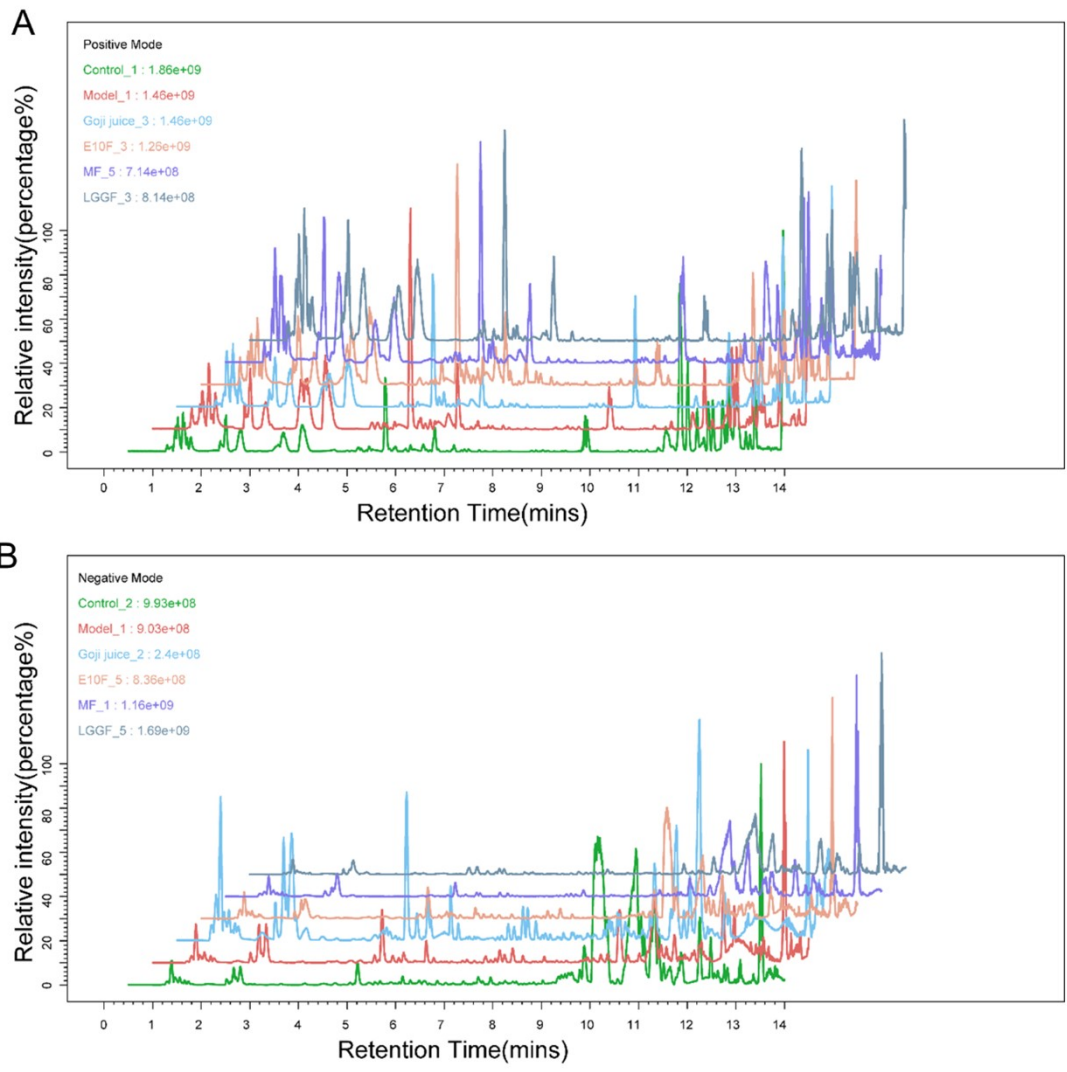

Fig. S4. Base peak chromatograms under both ion modes of metabolites of cecal contents.

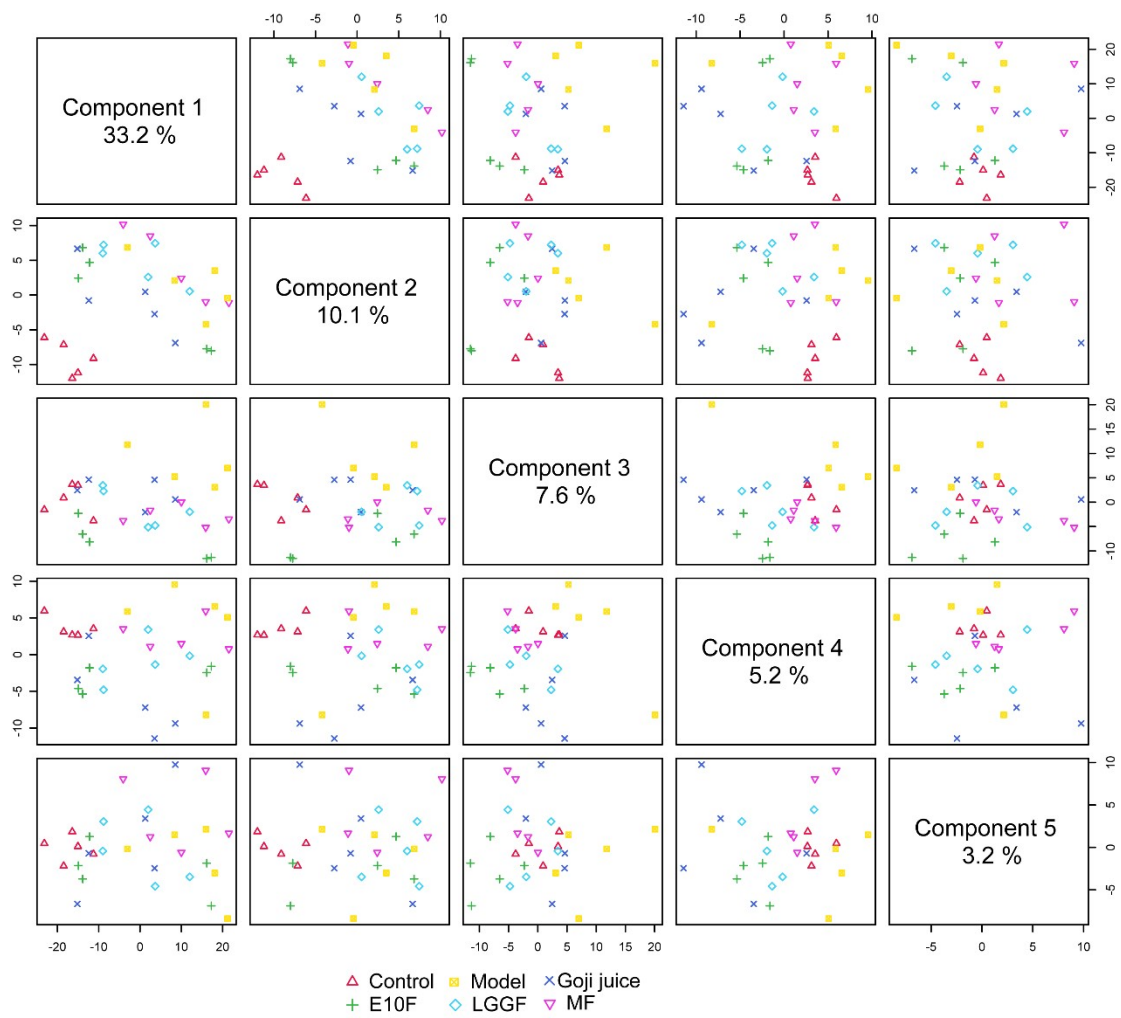

Fig. S5. PLS-DA of metabolites of cecal contents.
